# Supplementary material for: Evaluation and mechanistic analysis of the effect of the addition of alkaline earth metal CaO on Cd solidification enhancement in lightweight aggregate preparation
Source: Royal Society of Chemistry journal article supplement (doi:10.1039/d4ra04610b), 2024-01-01
Supplement: d4ra04610b1.pdf [file d4ra04610b1.pdf]

Supporting information

**Evaluation and mechanism analysis of alkaline earth metal  
CaO for Cd solidification enhancement in lightweight  
aggregates preparation**

Xin Gao <sup>1</sup>, Shouwei Jian <sup>\*1</sup>, Yuting Lei <sup>1</sup>, Baodong Li <sup>2</sup>, Jianxiang Huang <sup>1</sup>, Xiaoyao Ma <sup>1</sup>,

Xinxin He <sup>1</sup>

(<sup>1</sup> State Key Laboratory of Silicate Materials for Architectures, Wuhan University of Technology,  
Wuhan, Hubei 430070, China.

<sup>2</sup> Department of Architecture and Civil Engineering, Chalmers University of Technology, 412 96  
Gothenburg, Sweden)

---

## 1. Characterizations

The macroscopic properties of the lightweight aggregate sample tested in this experiment include volume expansion rate, apparent density, water absorption rate, and single particle compressive strength. Before testing, it is necessary to ensure that the sample is in a dry state. Among them, the volume expansion rate is characterized by the expansion index (BI), and the apparent density ( $\rho$ ). Besides, the determination of water absorption (W) was carried out in accordance with the national standard GB/T 17431.2-2010, and the single particle compressive strength (P) was obtained by testing with a laboratory fully automatic cement bending and compression testing machine. The final values of all test items are the average of six lightweight aggregate samples. The corresponding calculation formula of each test is as follows:

$$\text{Bloating index (BI): } BI = \frac{V_2 - V_1}{V_1} \times 100\%$$

$$\text{Apparent density } (\rho): \rho = M_1/V_2$$

$$\text{Water absorption (W): } W = \frac{M_2}{M_1} \times 100\%$$

$$\text{Compressive strength (P): } P = 2.8F_c/(\pi X^2)$$

$V_1$  and  $V_2$  represent the sample volumes before and after sintering of the LWAs,  $M_1$  and  $M_2$  represent the sample masses before and after water absorption of the LWAs,  $F_c$  (kN) is the pressure value (fracture load) at which the LWAs sample fracture failure under external force, and  $X$  (mm) is the diameter (distance between load points) of the samples between two load points.

The volatilization rate (H) of the LWA is calculated according to the Cd content measured by the inductively coupled plasma emission spectrometer (ICP-OES) (before the test, the sample should be dried and ground fine, and passed the 200 target sieve). The calculation formula is shown in equation (S1):

$$H = \left( 1 - \frac{K(1 - \text{LOI})}{S} \right) \times 100\% \quad \text{Eq.(S1)}$$

---

In equation (S1), H is the volatilization rate of Cd, K ( $\mu\text{g/g}$ ) is the Cd content in the sintered sample, S ( $\mu\text{g/g}$ ) is the Cd content of the samples before sintering, and LOI is the loss on ignition at 1000 °C, which obtained by X-ray fluorescence spectrometer (XRF).

The leaching test of heavy metal ions was conducted according to the Toxicity Characteristic Leaching Procedure (TCLP). The LWAs were broken into particles of about 5 mm, dried in an oven for 24 hours. Then the extraction solution with a pH at about  $2.88 \pm 0.05$  were prepared and the sample particles were added at a liquid-solid ratio of 20:1 (L/kg). The mixtures were shaken at a rate of  $110 \pm 10$  times/min for 18 hours in a horizontal oscillator, and then left to stand for 2 hours. The supernatant was extracted using a disposable syringe. The impurities were removed through a pinhole filter, and then the ion leaching concentration of heavy metal ions were tested by atomic absorption spectrometer (CONTAA-700).

After the leaching test, the sample was dried at a temperature of 105 °C for 24 hours, and the residual heavy metal cadmium content was tested by an inductively coupled plasma emission spectrometer (ICP-OES). The solidified rate (G) of the lightweight aggregate sample is calculated according to equation (S2).

$$G = \frac{C_2}{C_1} \times 100\% \quad \text{Eq.(S2)}$$

$C_1$  and  $C_2$  are the Cd content before and after leaching in the LWAs respectively ( $\mu\text{g/g}$ ).

X-ray fluorescence spectrometer (Zetium-X) was performed to analyze the chemical composition of the raw materials. The XRD was performed by a D8-Advance X-ray diffractometer (XRD, Bruker Optics, Germany) to analyze the mineral phase. The micro-structures of the samples were analyzed by SEM (Quanta 450 FEG) and the elements distribution of the samples in the LWAs were analyzed by SEM-EDS (ESCALAB 250Xi). The valence of different elements in the samples were analyzed by XPS (ESCALAB 250Xi). TG-MS tests are performed in an Ar atmosphere with a heating rate of 10°C/min up to 1300°C to analyze the gas emission from LWAs during high temperature sintering process.

Table S1 Chemical composition of raw materials (wt%)

| Raw materials | LOI  | SiO <sub>2</sub> | Al <sub>2</sub> O <sub>3</sub> | Fe <sub>2</sub> O <sub>3</sub> | CaO  | K <sub>2</sub> O | MgO  | Na <sub>2</sub> O | SO <sub>3</sub> | others |
|---------------|------|------------------|--------------------------------|--------------------------------|------|------------------|------|-------------------|-----------------|--------|
| CS            | 5.31 | 64.23            | 15.43                          | 6.72                           | 4.28 | 1.36             | 0.82 | 0.44              | 0.09            | 1.32   |
| LS            | 1.57 | 34.42            | 20.76                          | 2.05                           | 9.17 | 8.16             | 0.67 | 8.58              | 7.97            | 6.65   |

Table S2 Different CaO Content of Samples.

| CaO content (%)                 | 0.2        | 0.4        | 0.6        | 0.8        | 1.0        |
|---------------------------------|------------|------------|------------|------------|------------|
| KCl                             | Cl-LWA-0.2 | Cl-LWA-0.4 | Cl-LWA-0.6 | Cl-LWA-0.8 | Cl-LWA-1.0 |
| Na <sub>2</sub> SO <sub>4</sub> | S-LWA-0.2  | S-LWA-0.4  | S-LWA-0.6  | S-LWA-0.8  | S-LWA-1.0  |

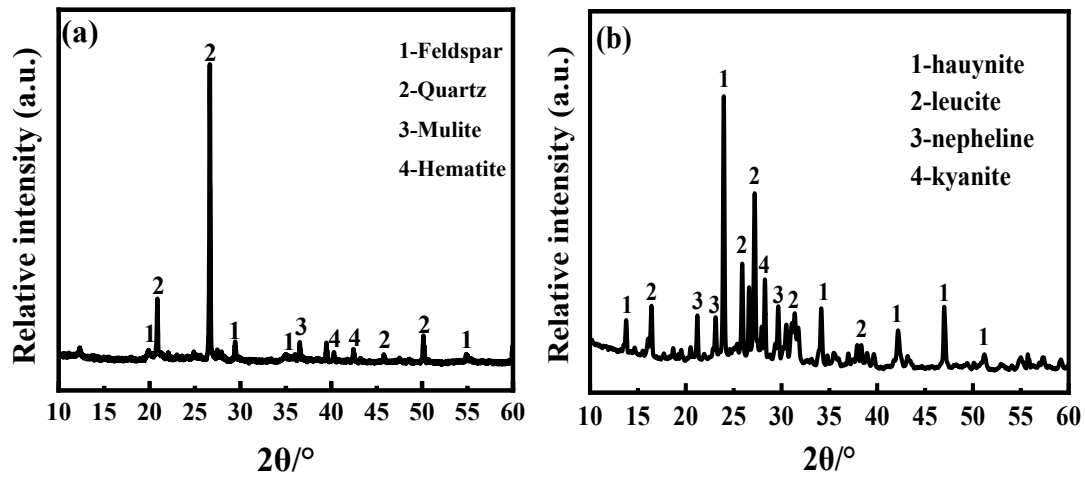

Figure S1 XRD patterns of (a) CS and (b) LS

## 2. Fitting of Arrhenius dynamics model

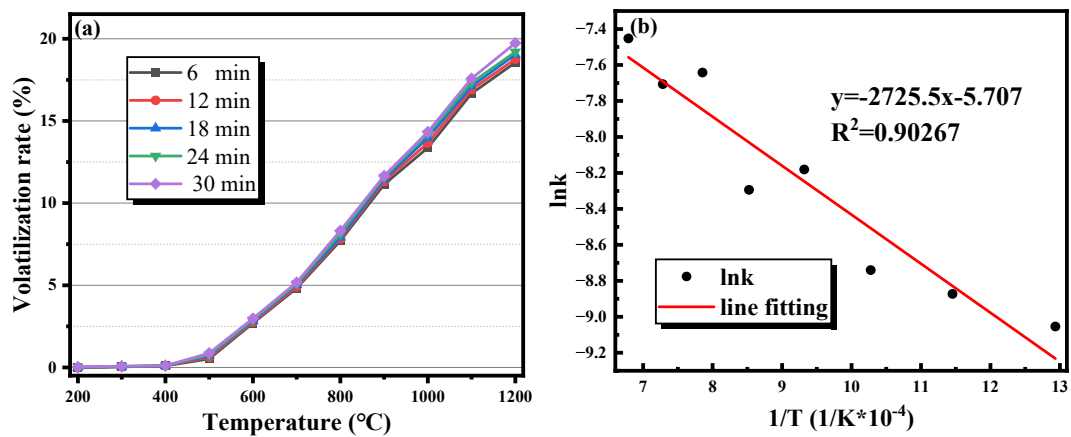

Figure S2. (a) Volatility at different sintering temperatures at different sintering time points and (b) 1/T with lnk fitting results of Cl-LWAs-0

Table S3. Fitting results of  $-\ln(1-H)$  and  $t$  for Cl-LWAs-0

| Temperature (°C) | Fitting results          | R <sup>2</sup> |
|------------------|--------------------------|----------------|
| 500              | $y = 0.00014x + 0.00447$ | 0.98493        |
| 600              | $y = 0.00012x + 0.02653$ | 0.99506        |
| 700              | $y = 0.00016x + 0.04852$ | 0.98447        |
| 800              | $y = 0.00028x + 0.07819$ | 0.96434        |
| 900              | $y = 0.00025x + 0.11696$ | 0.97281        |
| 1000             | $y = 0.00048x + 0.14112$ | 0.96811        |
| 1100             | $y = 0.00045x + 0.17966$ | 0.99685        |
| 1200             | $y = 0.00058x + 0.20109$ | 0.93858        |

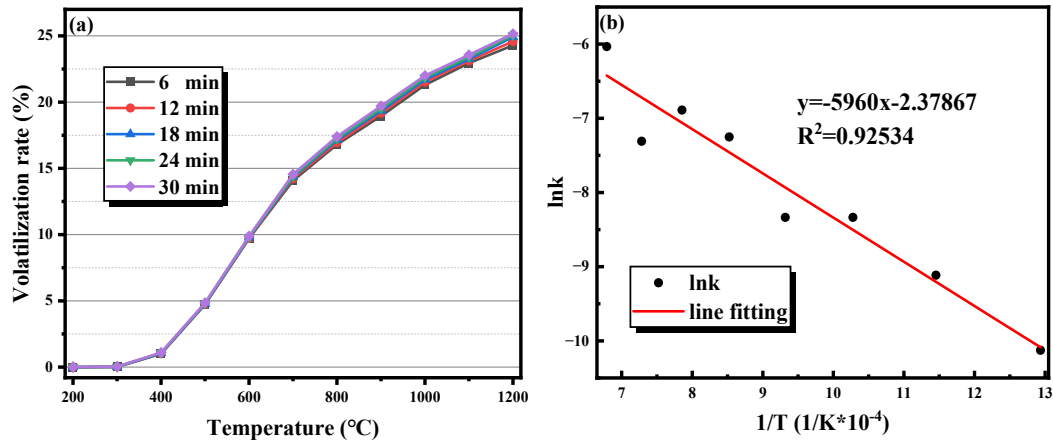

Figure S3. (a) Volatility at different sintering temperatures at different sintering time points and (b)  $1/T$  and  $\ln k$  fitting results of Cl-LWA-0.8

Table S4. Fitting results of  $-\ln(1-H)$  and  $t$  for Cl-LWAs-0.8

| Temperature (°C) | Fitting results          | R <sup>2</sup> |
|------------------|--------------------------|----------------|
| 500              | $y = 0.00004x + 0.00454$ | 0.90415        |
| 600              | $y = 0.00011x + 0.02019$ | 0.96007        |
| 700              | $y = 0.00024x + 0.09842$ | 0.94098        |
| 800              | $y = 0.00024x + 0.14799$ | 0.93876        |
| 900              | $y = 0.00071x + 0.18091$ | 0.98374        |
| 1000             | $y = 0.00102x + 0.00454$ | 0.97184        |
| 1100             | $y = 0.00067x + 0.23640$ | 0.99212        |
| 1200             | $y = 0.00240x + 0.33065$ | 0.98994        |

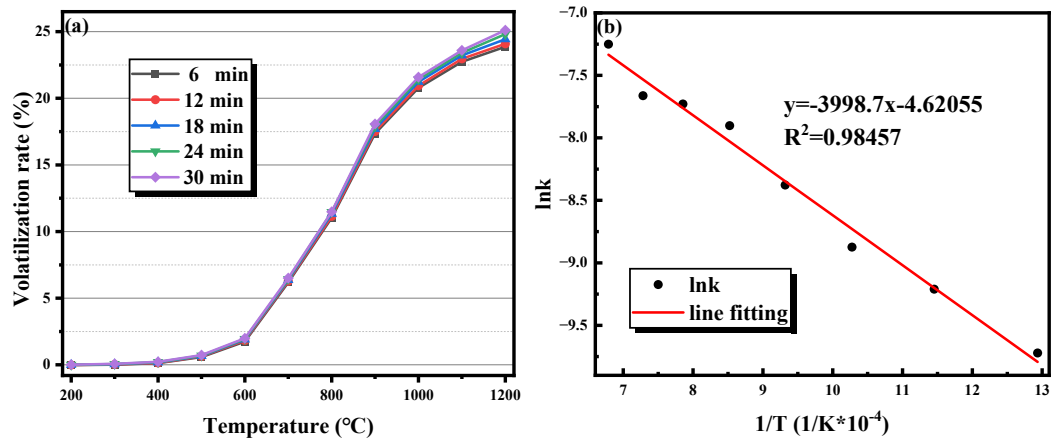

Figure S4. (a) Volatility at different sintering temperatures at different sintering time points and (b)  $1/T$  and  $\ln k$  fitting results of S-LWAs-0

Table S5. Fitting results of  $-\ln(1-H)$  and  $t$  for S-LWAs-0

| Temperature (°C) | Fitting results          | $R^2$   |
|------------------|--------------------------|---------|
| 500              | $y = 0.00006x + 0.00553$ | 0.99244 |
| 600              | $y = 0.00010x + 0.01716$ | 0.96509 |
| 700              | $y = 0.00014x + 0.06304$ | 0.99501 |
| 800              | $y = 0.00023x + 0.11566$ | 0.93289 |
| 900              | $y = 0.00037x + 0.18819$ | 0.99815 |
| 1000             | $y = 0.00044x + 0.23028$ | 0.98957 |
| 1100             | $y = 0.00047x + 0.25534$ | 0.99570 |
| 1200             | $y = 0.00071x + 0.26781$ | 0.99154 |

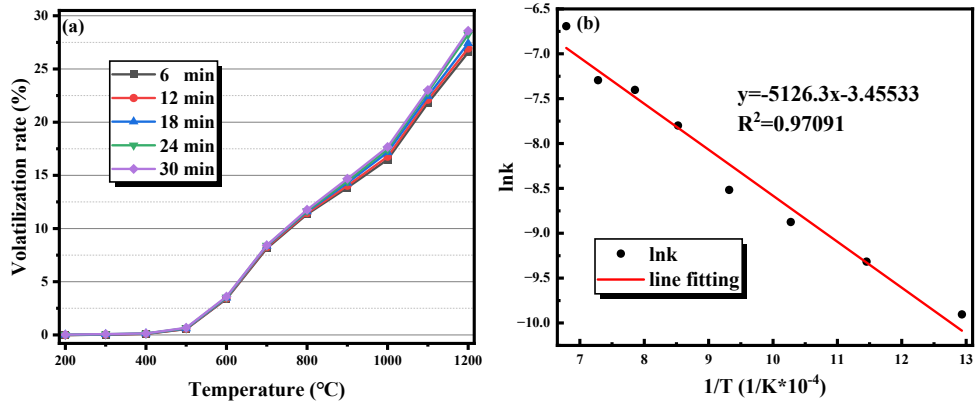

Figure S5. (a) Volatility at different sintering temperatures at different sintering time points and (b)  $1/T$  and  $\ln k$  fitting results of S-LWAs-0.8

Table S6. Fitting results of  $-\ln(1-H)$  and  $t$  for S-LWAs-0.8

| Temperature (°C) | Fitting results          | $R^2$   |
|------------------|--------------------------|---------|
| 500              | $y = 0.00005x + 0.00514$ | 0.98631 |
| 600              | $y = 0.00009x + 0.03383$ | 0.98807 |
| 700              | $y = 0.00014x + 0.08429$ | 0.91131 |
| 800              | $y = 0.00020x + 0.11927$ | 0.98417 |
| 900              | $y = 0.00041x + 0.14645$ | 0.99550 |
| 1000             | $y = 0.00061x + 0.17648$ | 0.98852 |
| 1100             | $y = 0.00068x + 0.24196$ | 0.99076 |
| 1200             | $y = 0.00124x + 0.29996$ | 0.97609 |

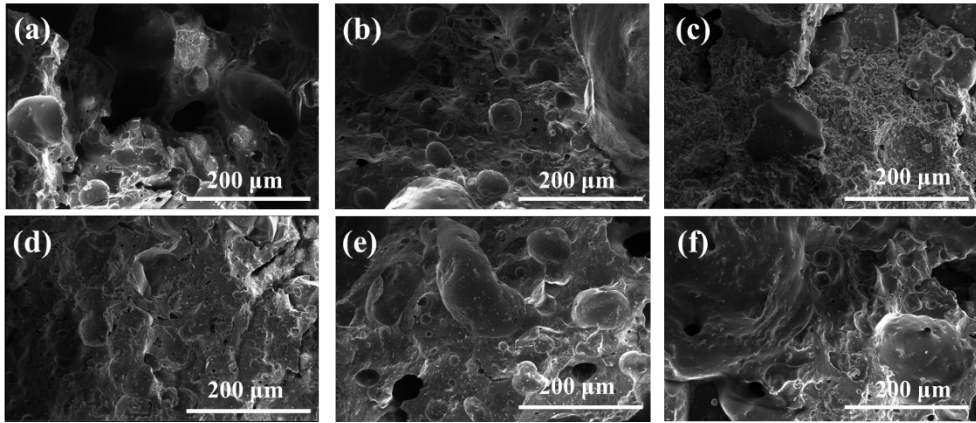

Figure S6. SEM micrographs of the LWA samples.



Table S7. EDS results of elements of Cl-LWA-0 in selected area (wt.%).

| <b>Elements</b> | <b>wt%</b> | <b>Wt % Sigma</b> | <b>At%</b> |
|-----------------|------------|-------------------|------------|
| <b>O</b>        | 67.23      | 0.32              | 78.55      |
| <b>Na</b>       | 1.20       | 0.12              | 0.97       |
| <b>Al</b>       | 7.17       | 0.14              | 4.97       |
| <b>Si</b>       | 20.67      | 0.22              | 13.75      |
| <b>K</b>        | 3.10       | 0.11              | 1.48       |
| <b>Ca</b>       | 0.56       | 0.09              | 0.26       |
| <b>Cd</b>       | 0.08       | 0.21              | 0.01       |
| <b>Total</b>    | 100.00     |                   | 100.00     |

Table S8. EDS results of elements of Cl-LWAs-0.8 in selected area (wt.%).

| <b>Elements</b> | <b>wt%</b> | <b>Wt % Sigma</b> | <b>At%</b> |
|-----------------|------------|-------------------|------------|
| <b>O</b>        | 55.87      | 0.37              | 69.80      |
| <b>Na</b>       | 1.42       | 0.11              | 1.23       |
| <b>Al</b>       | 9.18       | 0.16              | 6.80       |
| <b>Si</b>       | 26.12      | 0.26              | 18.59      |
| <b>K</b>        | 3.03       | 0.13              | 1.55       |
| <b>Ca</b>       | 3.88       | 0.14              | 1.93       |
| <b>Cd</b>       | 0.50       | 0.24              | 0.09       |
| <b>Total</b>    | 100.00     |                   | 100.00     |

Table S9. EDS results of elements of S-LWA-0 in selected area (wt.%).

| <b>Elemnts</b> | <b>wt%</b> | <b>Wt % Sigma</b> | <b>At%</b> |
|----------------|------------|-------------------|------------|
| <b>O</b>       | 57.05      | 0.34              | 70.76      |
| <b>Na</b>      | 1.47       | 0.11              | 1.27       |
| <b>Al</b>      | 7.03       | 0.13              | 5.17       |
| <b>Si</b>      | 28.42      | 0.25              | 20.08      |

|              |        |      |        |
|--------------|--------|------|--------|
| <b>K</b>     | 1.64   | 0.10 | 0.83   |
| <b>Ca</b>    | 3.50   | 0.13 | 1.73   |
| <b>Cd</b>    | 0.89   | 0.23 | 0.16   |
| <b>Total</b> | 100.00 |      | 100.00 |

Table S10. EDS results of elements of S-LWAs-0.8 in selected area (wt.%).

| <b>Elements</b> | <b>wt%</b> | <b>Wt % Sigma</b> | <b>At%</b> |
|-----------------|------------|-------------------|------------|
| <b>O</b>        | 57.92      | 0.33              | 71.53      |
| <b>Na</b>       | 2.77       | 0.12              | 2.38       |
| <b>Al</b>       | 8.07       | 0.13              | 5.91       |
| <b>Si</b>       | 24.74      | 0.22              | 17.40      |
| <b>K</b>        | 1.98       | 0.10              | 1.00       |
| <b>Ca</b>       | 3.11       | 0.12              | 1.54       |
| <b>Cd</b>       | 1.41       | 0.21              | 0.25       |
| <b>Total</b>    | 100.00     |                   | 100.00     |

Table S11. Comparison of the Cd solidification ratio in this work with previously relevant systems.

| <b>System</b>                                     | <b>Treatment</b>                               | <b>Solidification ratio(%)</b> | <b>Leached (mg/L)</b> | <b>References</b> |
|---------------------------------------------------|------------------------------------------------|--------------------------------|-----------------------|-------------------|
| <b>Municipal solid waste incineration</b>         | DFT calculation & adjust pH                    | 98.92                          | -                     | 1                 |
| <b>Contaminated soils</b>                         | Binder preparation                             | -                              | 0.620                 | 2                 |
| <b>Municipal solid waste incineration-fly ash</b> | Vulcanization, precipitation and bio-oxidation | -                              | 0.070                 | 3                 |

---

|                                                        |                                              |       |         |           |
|--------------------------------------------------------|----------------------------------------------|-------|---------|-----------|
| <b>Lead-zinc tailings</b>                              | Using highly reactive pozzolanic solid waste | 97.05 | -       | 4         |
| <b>Municipal solid waste incineration fly ash</b>      | MgO-based binders                            | -     | -       | 5         |
| <b>Phosphogypsum slag-based cementitious materials</b> | Carbonization                                | -     | 0.00427 | 6         |
| <b>Contaminated soils</b>                              | Sintering                                    | >99.9 | -       | This work |

---

#### References:

1. F. Liu, Z. Liu, Y. Gao, R. Liu, D. Wang, B. Wang and Y. You, *Chemosphere*, 2024, **348**, 140741.
2. Y.-Z. Liu, C.-Z. Zhang, K. Wu and S.-Y. Liu, *Construction and Building Materials*, 2024, **416**, 135162.
3. X. Lv and J. Deng, *J. Environ. Chem. Eng*, 2024, **12**, 112772.
4. H. Wang, C. Ju, M. Zhou, J. Chen, Y. Dong and H. Hou, *Journal of Environmental Management*, 2022, **306**, 114473.
5. Y. Duan, X. Liu, L. Zheng, Z. Khalid, L. Long and X. Jiang, *Process Saf. Environ. Prot.*, 2023, **175**, 160-167.
6. Z. Ren, L. Wang, H. Wang, M. Li, S. Liu and L. Wan, *Construction and Building Materials*, 2024, **437**.
